# Supplementary material for: An Artificial-Intelligence-Discovered Functional Ingredient, NRT_N0G5IJ, Derived from Pisum sativum, Decreases HbA1c in a Prediabetic Population
Source: MDPI journal article supplement (doi:10.3390/nu13051635), 2021-05-13
Supplement: s1 [file s1]

Supplementary

# An Artificial Intelligence Discovered Functional Ingredient, NRT\_N0G5IJ, Derived from *Pisum sativum*, Decreases HbA1c in a Prediabetic Population.

Sweeny Chauhan, Alish Kerr, Brian Keogh, Stephanie Nolan, Rory Casey, Alessandro Adelfio, Niall Murphy, Aoife Doherty, Heidi Davis, Audrey M. Wall \* and Nora Khaldi

**Table S1.** Baseline values for trial NCT03851666.

|                                   | Placebo          | Rice NPN         | NRT_N0G5IJ       |
|-----------------------------------|------------------|------------------|------------------|
| Fasting Glucose, mmols/L          |                  |                  |                  |
| Mean (SD)                         | 6.003 (0.7672)   | 5.702 (0.6538)   | 5.656 (0.7141)   |
| Range                             | 5.07–8.07        | 4.62–7.34        | 4.54–7.85        |
| Weight, kg                        |                  |                  |                  |
| Mean (SD)                         | 90.61 (10.86)    | 90.12 (16.08)    | 88.82 (17.18)    |
| Range                             | 70–115.3         | 64.6–129.5       | 59.5–123         |
| BMI, kg/m <sup>2</sup>            |                  |                  |                  |
| Mean (SD)                         | 31.14 (3.35)     | 31.77 (3.32)     | 30.04 (4.22)     |
| Range                             | 24.5–34.95       | 23.7–34.9        | 20.8–34.78       |
| Fructosamine , micromol/L         |                  |                  |                  |
| Mean (SD)                         | 243.6 (25.64)    | 254.9 (16.38)    | 243.2 (20.28)    |
| Range                             | 152–262          | 219–294          | 206–276          |
| OGTT, mmol/L                      |                  |                  |                  |
| Mean (SD) AUC values for Baseline | 18.138 (4.3369)  | 17.980 (3.9801)  | 16.746 (3.1087)  |
| Insulin, microU/mL                |                  |                  |                  |
| Mean (SD) AUC values for Baseline | 168.06 (102.970) | 136.73 (120.724) | 212.06 (161.076) |

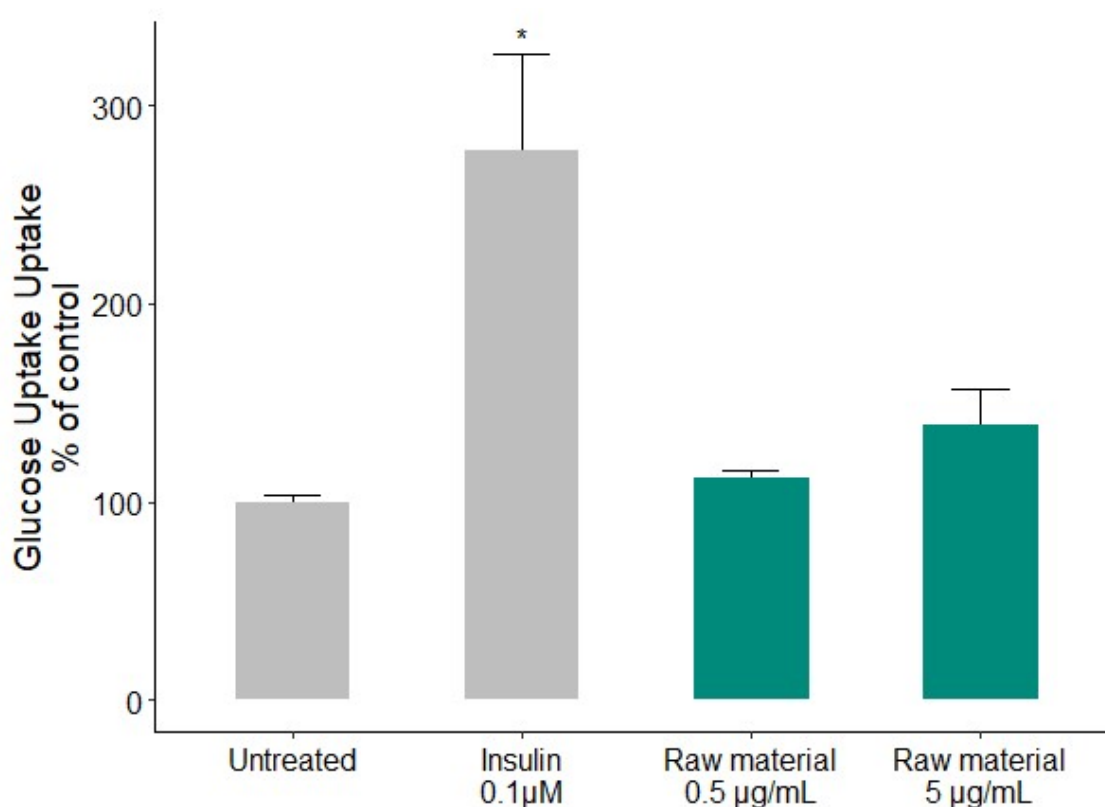

**Figure S1.** Effect of raw material on glucose uptake in human skeletal cells. Skeletal muscle cells were stimulated for 20 minutes with Insulin (0.1µM) or a dose of raw material (as indicated) prior to glucose uptake assessment. (Data is represented as mean  $\pm$  SD; \*  $p < 0.05$ ).

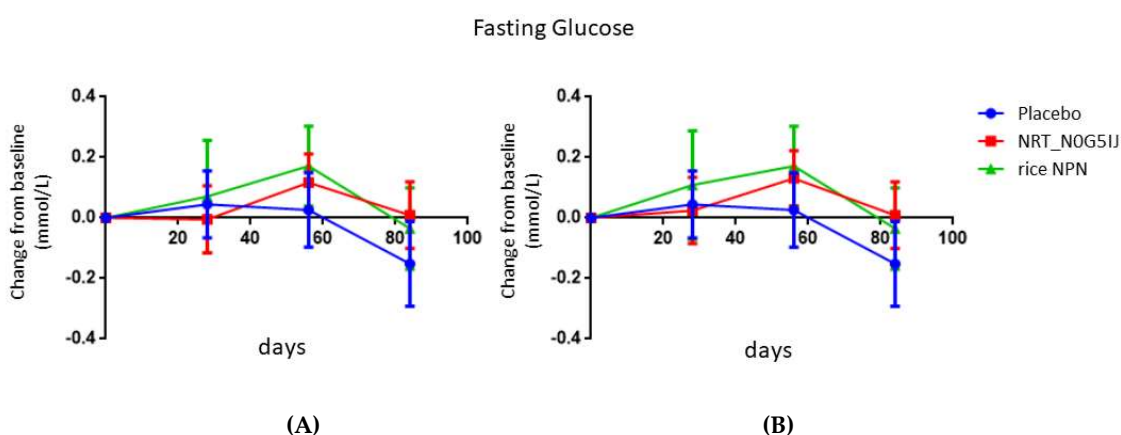

**Figure S2.** Effect of NRT\_N0G5IJ on fasting glucose. Change in fasting glucose during 12 weeks of consumption of either NRT\_N0G5IJ, rice NPN or placebo from baseline values. Each symbol represents the mean  $\pm$  1  $\times$  S.E.M. of at least 18 observations in **A**) per protocol and **B**) intention to treat populations.

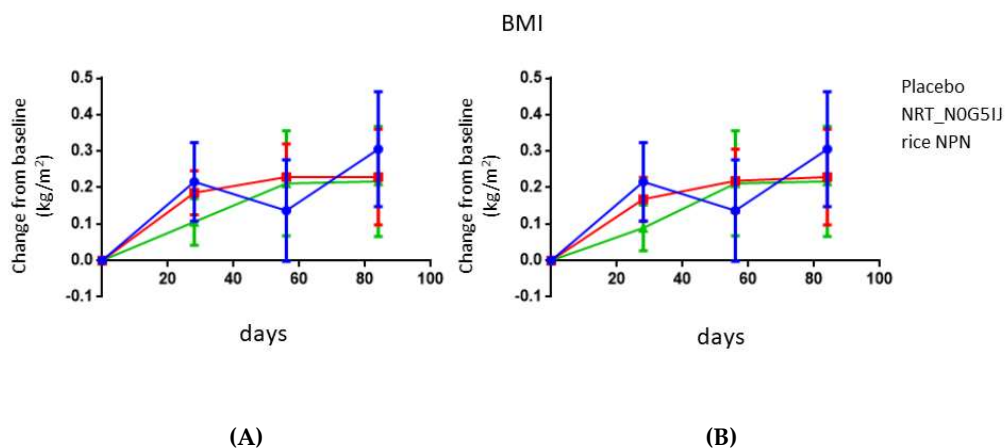

**Figure S3.** Effect of NRT\_N0G5IJ on BMI. Change in BMI during 12 weeks of consumption of either NRT\_N0G5IJ, rice NPN or placebo. Outliers have been removed. Each symbol represents the mean  $\pm$  1  $\times$  S.E.M. of at least 18 observations in **A)** per protocol and **B)** intention to treat populations.

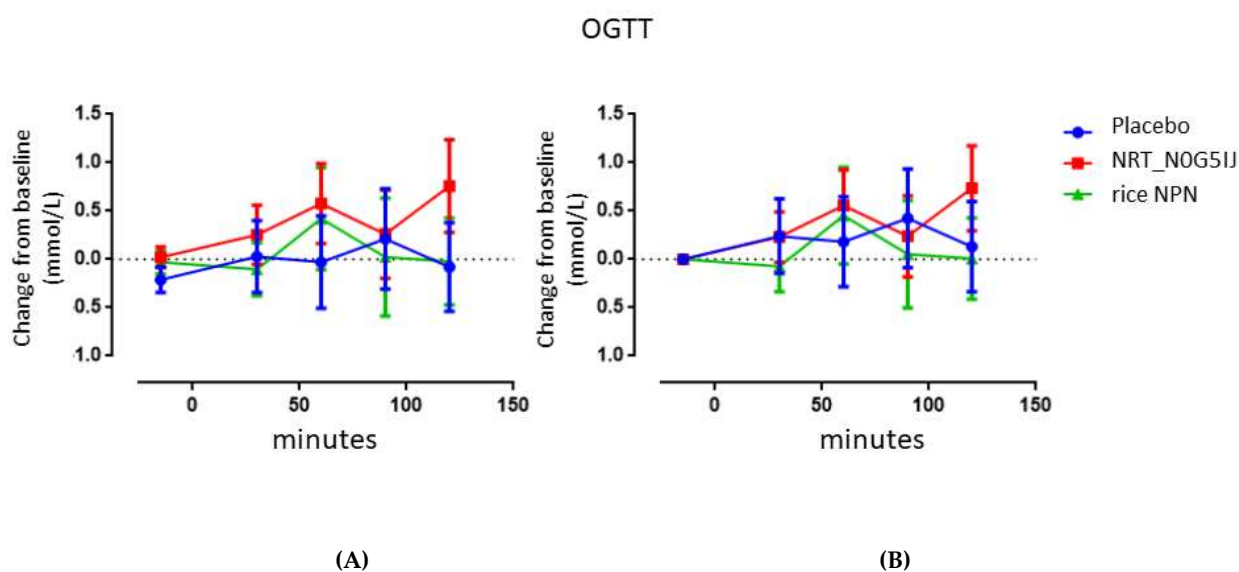

**Figure S4.** Effect of NRT\_N0G5IJ on OGTT. Change in OGTT values over 12 weeks of consumption of either NRT\_N0G5IJ, rice NPN or placebo in the intention to treat population where **A)** Outliers have been removed and **B)** outliers have not been removed. The per protocol population yielded similar results. Each symbol represents the mean  $\pm$  1  $\times$  S.E.M. of at least 19 observations.

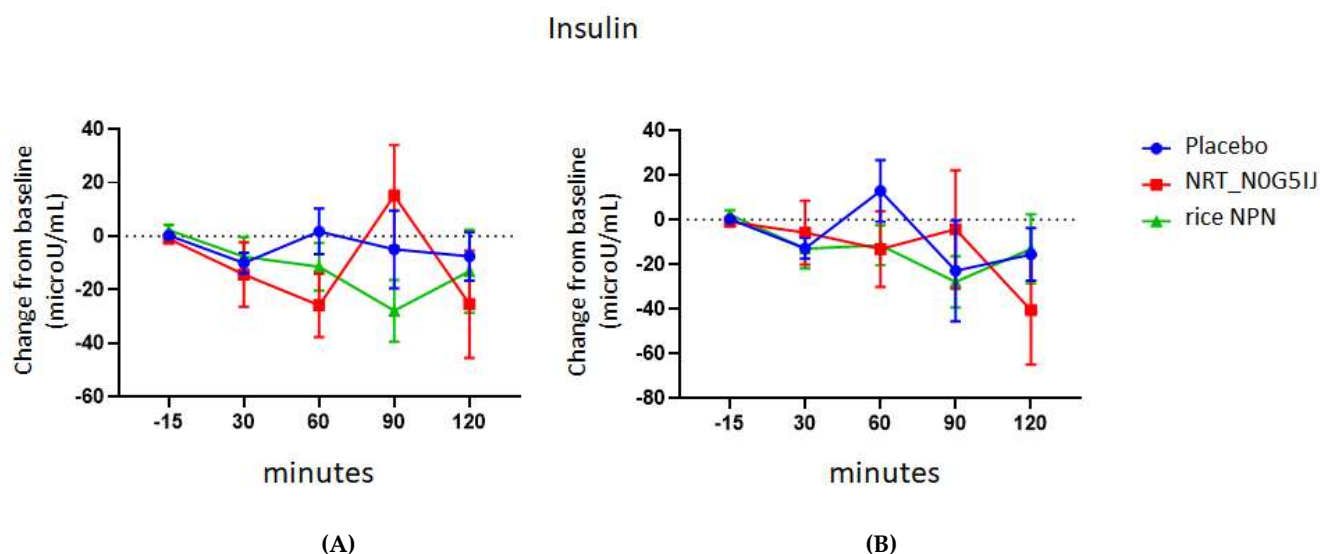

**Figure S5.** Effect of NRT\_N0G5IJ on Insulin. Change in insulin values over 12 weeks of consumption of either NRT\_N0G5IJ, rice NPN or placebo in the intention to treat population where **A)** Outliers have been removed and **B)** outliers have not been removed. The per protocol population yielded similar results. Each symbol represents the mean  $\pm$  1  $\times$  S.E.M. of at least 19 observations.

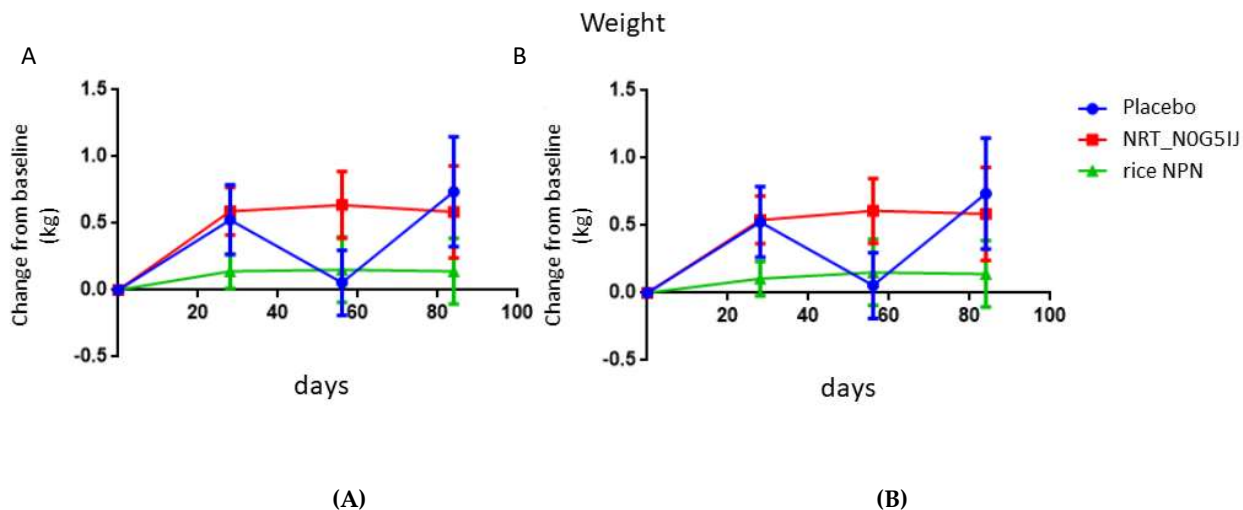

**Figure S6.** Effect of NRT\_N0G5IJ on weight. Change in weight during 12 weeks of consumption of either NRT\_N0G5IJ, rice NPN or placebo. Outliers have been removed. Each symbol represents the mean  $\pm$  1  $\times$  S.E.M. of at least 17 observations in **A)** per protocol and **B)** intention to treat populations.

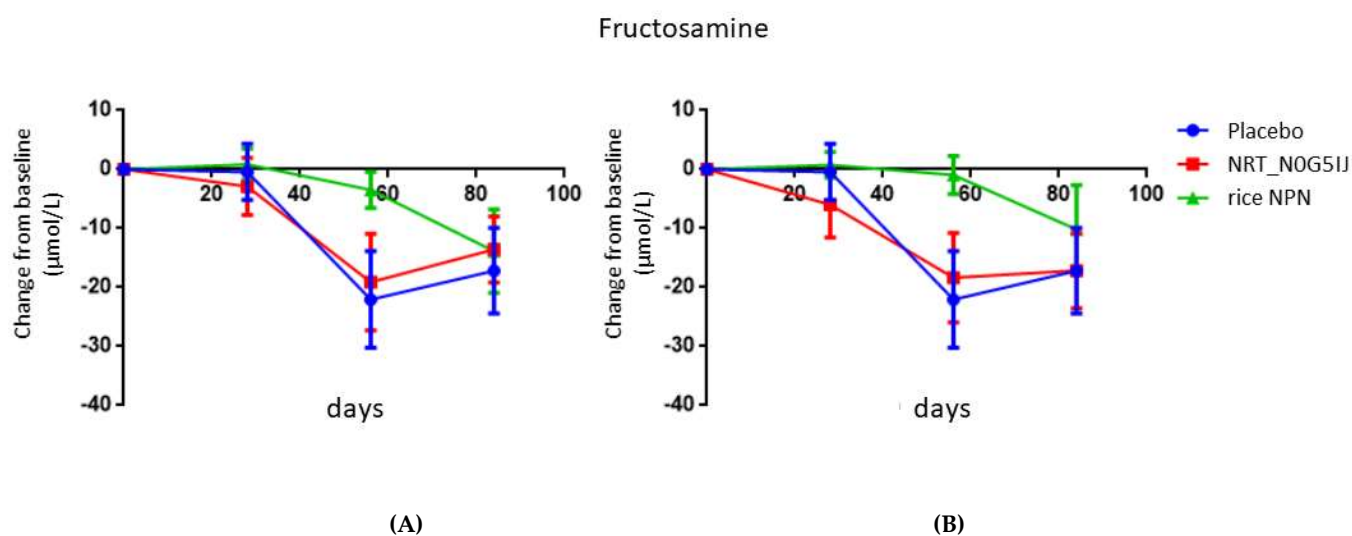

**Figure S7.** Effect of NRT\_N0G5IJ on fructosamine. Change in fructosamine during 12 weeks of consumption of either NRT\_N0G5IJ, rice NPN or placebo. Outliers have been removed. Each symbol represents the mean  $\pm$  1 x S.E.M. of at least; 13 observations in **A)** per protocol; and **B)** 15 observations in intention to treat populations.
